# Supplementary material
Source: PubMed Central journal article supplement (PMC7253022)
Supplement: jciinsight-5-136095-s063.pdf [file jciinsight-5-136095-s063.pdf]

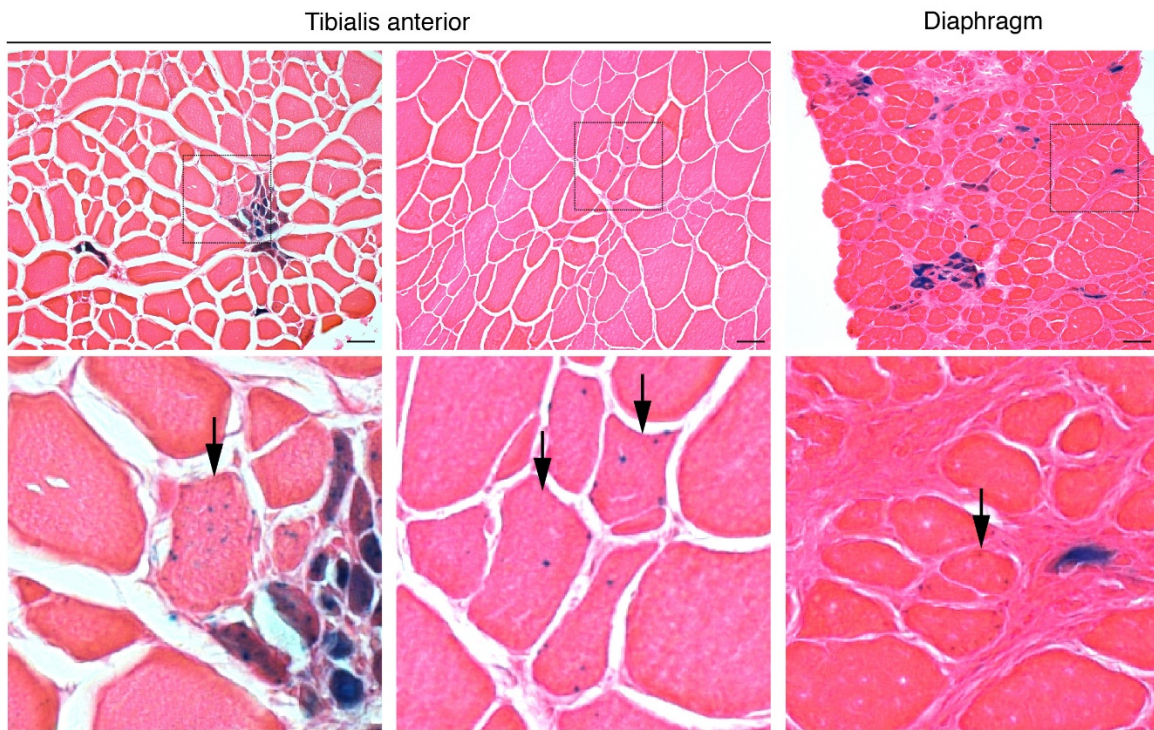

**Supplemental Figure 1. Myomaker expression in myofibers of dystrophic muscle.** X-gal stains of cross-sections of tibialis anterior (TA) and diaphragm muscle from 6-8 month old *mdx Myomaker<sup>LacZ/+</sup>* mice showing expression of LacZ in dystrophic myofibers, both in concentrated clusters of myofibers as well as scattered in a punctate pattern (inset). Scale bars: 50  $\mu$ m.

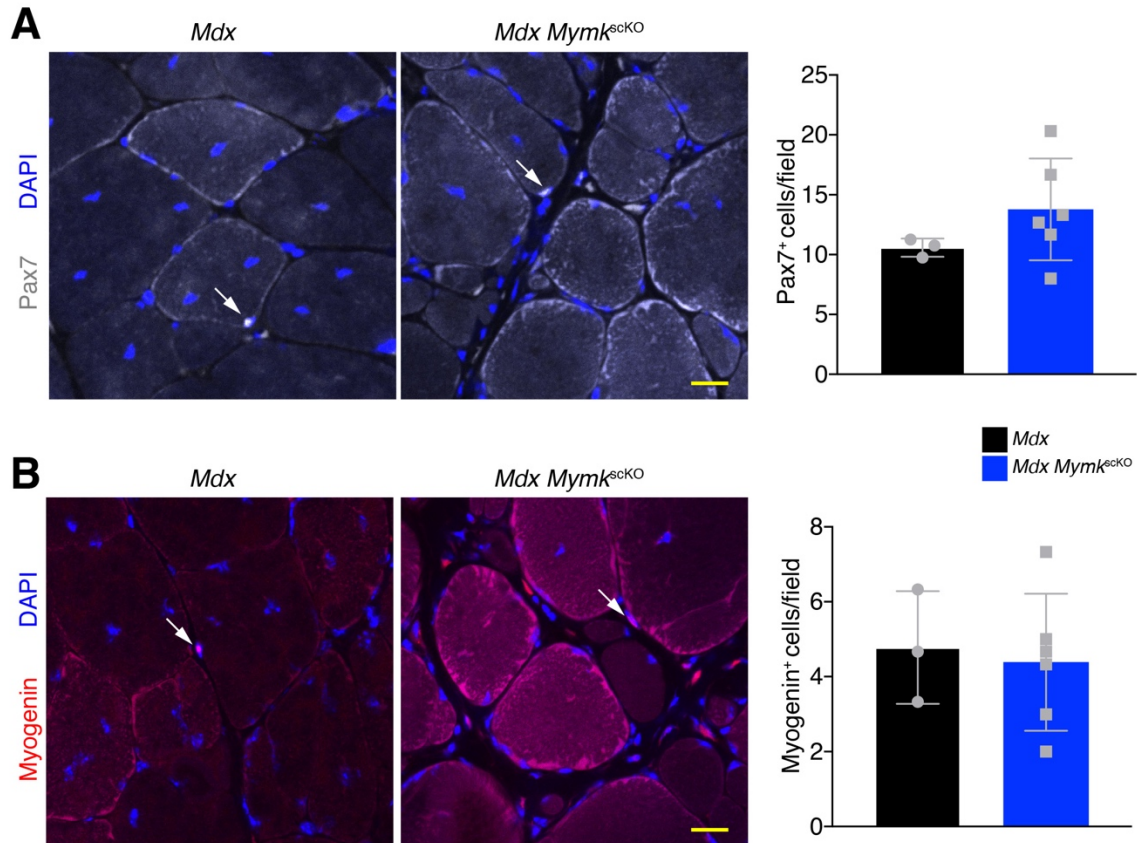

**Supplemental Figure 2. The satellite cell population is maintained in *mdx Mymk<sup>scKO</sup>* mice.** (A) Pax7 immunofluorescence shows persistence of SCs following deletion of Myomaker. Quantification of Pax7<sup>+</sup>/DAPI<sup>+</sup> cells shows comparable tissue concentration to controls. (B) Myogenin immunofluorescence reveals similar levels of activated myoblasts in *mdx Mymk<sup>scKO</sup>* mice and controls. Data are represented as mean ± SD. Scale bars: 20 μm. *n* = 3-6.

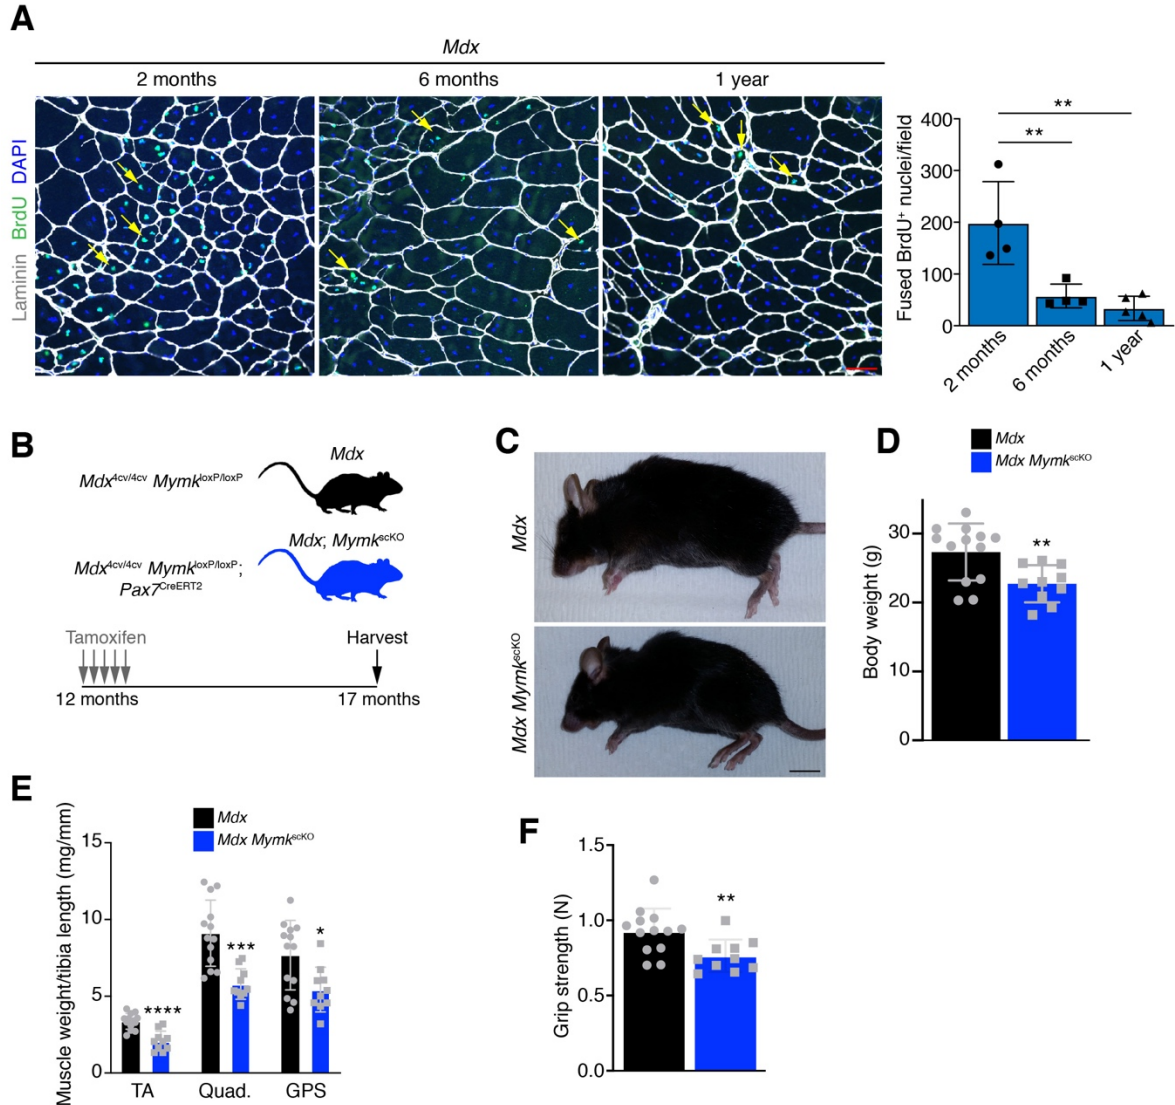

**Supplemental Figure 3. Satellite cell fusion is required for regeneration in older *mdx* mice.** (A) *Mdx* mice at various ages (2 months, 6 months, and 1 year) were injected with BrdU daily for 14 days prior to sacrifice in order to assess fusion rates. Quantification indicates a steep drop in fusion levels between 2 and 6 months ( $n = 4$ ). (B) Schematic for ablation of Myomaker in SCs of 12 month old *mdx* mice. (C) Gross appearance of *mdx Mymk<sup>scKO</sup>* mice showed smaller size, frail body habitus, and kyphosis of the spine. (D) Body weights of *mdx Mymk<sup>scKO</sup>* mice were significantly reduced by 5 months following initial Myomaker deletion. (E) Individual dry muscle weights of tibialis anterior (TA), quadriceps, and gastrocnemius/plantaris/soleus (GPS) show loss of muscle mass. (F) Grip strength was measured on a forelimb meter and showed impaired function in dystrophic mice with Myomaker-deficient SCs. Statistical analyses and data presentation: (A) one-way ANOVA with Tukey post-hoc comparison,  $**p < 0.01$ . (D-F) unpaired t-test;  $*p < 0.05$ ,  $**p < 0.01$ ,  $***p < 0.001$ ,  $****p < 0.0001$ . Data are represented as mean  $\pm$  SD. Scale bars: (A) 50  $\mu$ m; (C) 1 cm.  $n = 10-13$  except where noted.

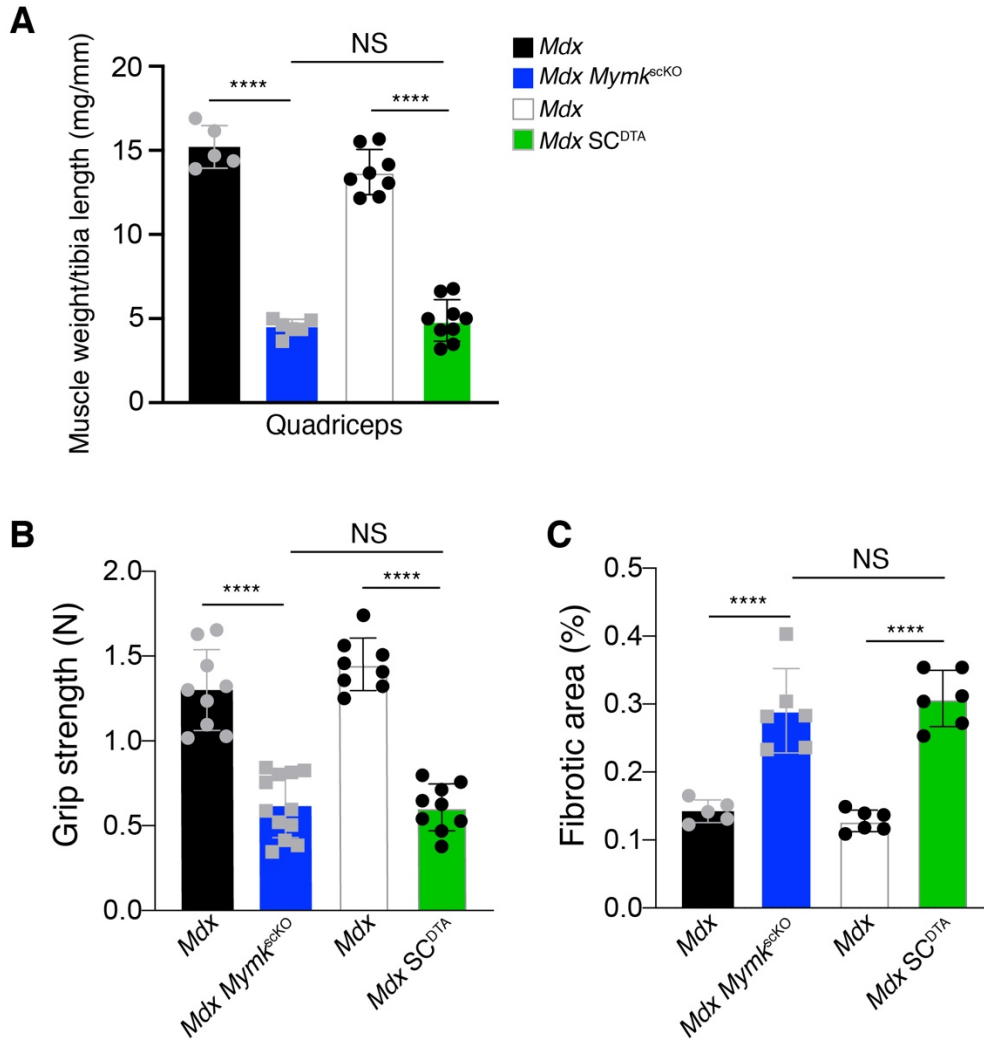

**Supplemental Figure 4. Equivalence of *mdx Myrk<sup>scKO</sup>* and *mdx SC<sup>DTA</sup>* phenotypes.**

(A) Juxtaposition of dry quadriceps weights from *mdx Myrk<sup>scKO</sup>* and *mdx SC<sup>DTA</sup>* mice and respective controls ( $n = 5-11$ ). (B) Comparison of forelimb grip strength measurements from both models ( $n = 8-11$ ). (C) Comparison of quantification of fibrotic area from Picosirius Red staining of tibialis anterior (TA) cross-sections ( $n = 5-6$ ). Statistical analyses and data presentation: (A), (B), (C) one-way ANOVA with Tukey post-hoc comparison, \*\*\*\* $p < 0.0001$ . Data are represented as mean  $\pm$  SD.



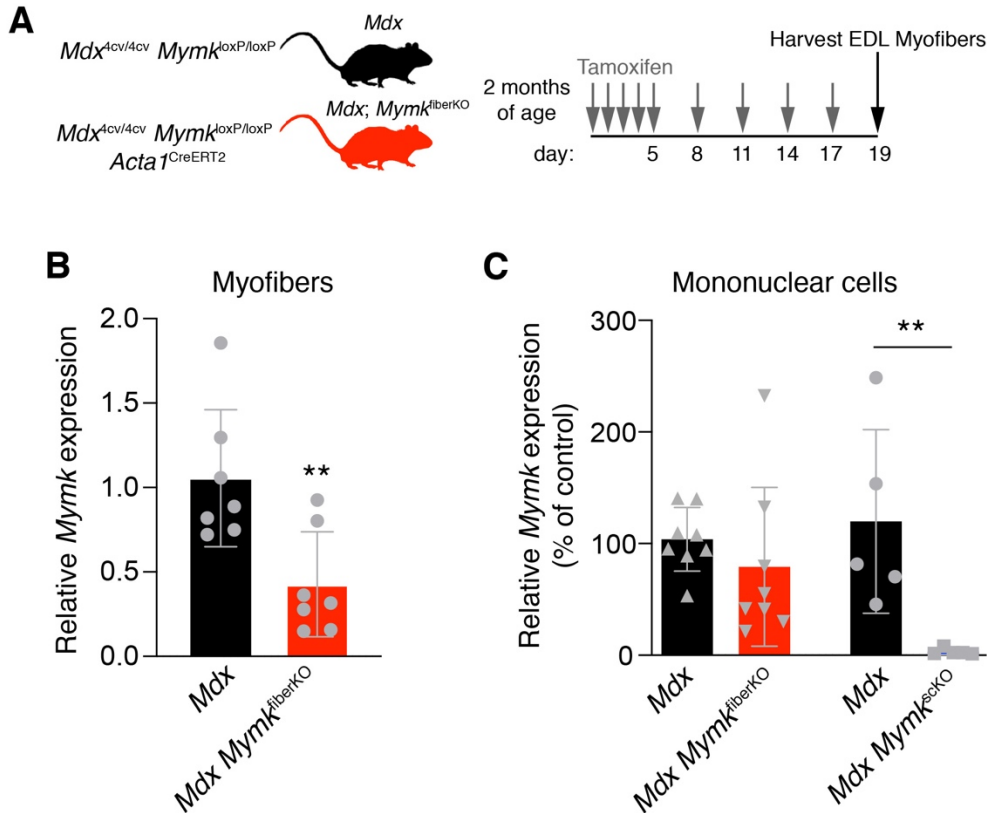

**Supplemental Figure 5. *Mymk* transcription is downregulated in isolated muscle fibers of *mdx Mymk*<sup>fiberKO</sup> mice.** (A) Schematic showing tamoxifen administration of mice prior to sacrifice and myofiber isolation from the extensor digitorum longus muscle. (B) qPCR for *Mymk* mRNA from isolated muscle fibers ( $n = 7$ ). (C) qPCR for *Mymk* in isolated mononuclear cells shows persistent expression in *mdx Mymk*<sup>fiberKO</sup> mice but efficient deletion in *mdx Mymk*<sup>scKO</sup> mice. Expression is presented relative to control for each model ( $n = 5-8$ ). Statistical analyses and data presentation: (B) unpaired t-test, \*\* $p < 0.01$ . (C) Mann-Whitney test, \*\* $p < 0.01$ . Data are represented as mean  $\pm$  SD.

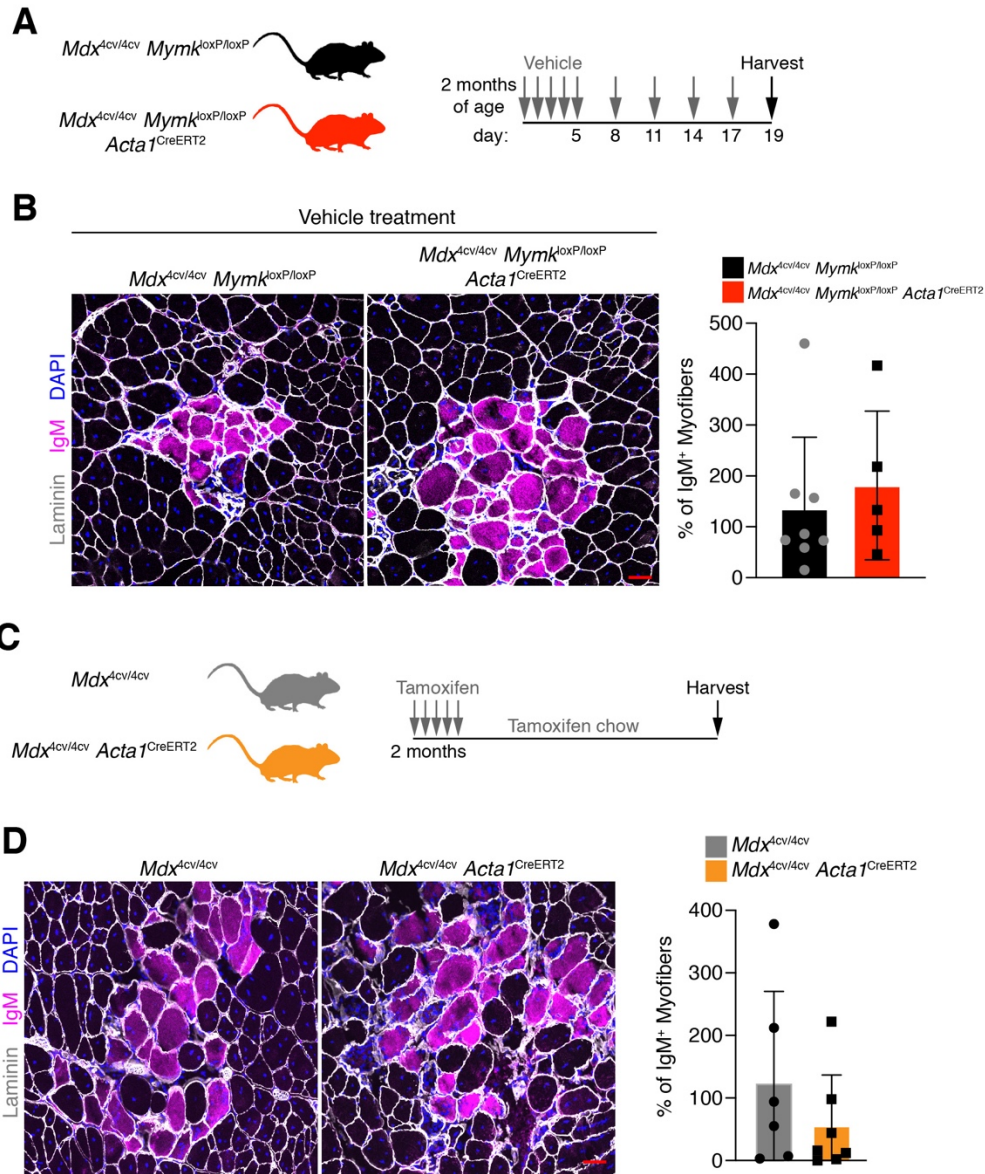

**Supplemental Figure 6. No reduction in muscle damage is observed in vehicle-treated *mdx Mymk*<sup>fiberKO</sup> mice or due to activation of *Acta1*<sup>CreER</sup> alone. (A)** Schematic of treatment with vehicle-only injections. (B) No reduction in IgM<sup>+</sup> myofibers was seen in cross-sections of vehicle-treated *mdx Mymk*<sup>fiberKO</sup> quadriceps (rectus femoris) muscle. (C) Schematic of experiment to test the effect of tamoxifen-induced *Acta1*<sup>CreERT2</sup> activation in *mdx* mice in the absence of floxed Myomaker alleles. (D) *Acta1*<sup>CreERT2</sup> activation alone does not reduce IgM<sup>+</sup> myofibers in dystrophic rectus femoris muscle with quantification. Data are represented as mean ± SD. Scale bars: (B), (D) 50 μm.
